# Supplementary material
Source: publisher site journal article supplement (https://www.dovepress.com/get_supplementary_file.php?f=421583.docx)
Supplement: Supplementary file 1 [file get_supplementary_file.php]

Supplement 1:

**List of all ethics committee centers**

| **Sr no** | **Name of investigator** | **Name of ethics committee** |
| --- | --- | --- |
| 1 | Dr Sheetal Yadav | ABVIMS & Dr RML Hospital, New Delhi |
| 2 | Dr Koushik Lahiri | HP Poddar Memorial Clinic & Nursing Home, Kolkata |
| 3 | Dr Abhishek De | HP Poddar Memorial Clinic & Nursing Home, Kolkata |
| 4 | Dr Anupam Das | HP Poddar Memorial Clinic & Nursing Home, Kolkata |
| 5 | Dr Abir Saraswat | Independent Ethics Committee Narayana Diagnostics, Lucknow |
| 6 | Dr Bela Shah | Om Institutional Ethics Committee, Ahmedabad |
| 7 | Dr Manjunath Shenoy | Omega Ethical Committee, Mangalore |
